# Supplementary material
Source: PubMed Central journal article supplement (PMC2818108)

## Supplementary data

**Figure S1.** Daidzein- and formononetin-mediated detachment is reversible. Trophozoites attached to the bottom of 12-well plates were treated with doses that detach ~90% of trophozoites in 15 min (40  $\mu$ M daidzein or 10  $\mu$ M formononetin) or with 1:1000 DMSO. Detached cells were washed with PBS and resuspended in fresh growth medium and allowed to reattach to a new well for 2 h. As a positive control, untreated trophozoites were detached by chilling on ice for 15 min and allowed to reattach as described above. Results are shown as means $\pm$ SD,  $n=3$ .

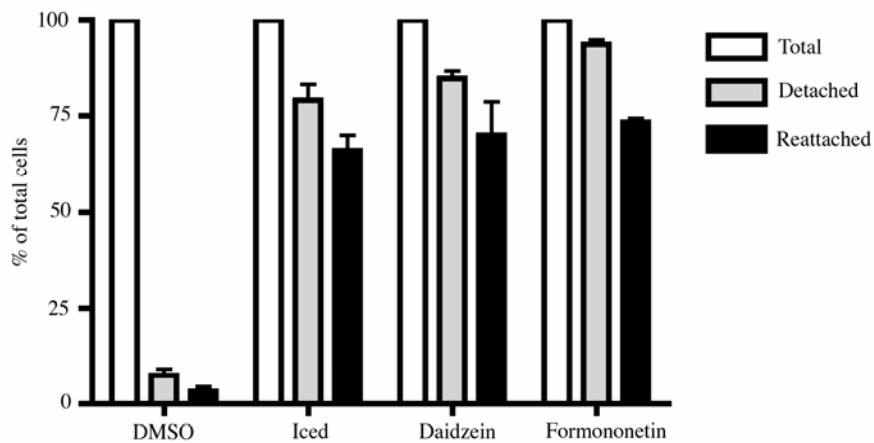

Supplement: dkp501_1.pdf [file dkp501_1.pdf]
